# Supplementary material for: Comparison of antivascular endothelial growth factor treatment for myopia choroidal neovascularisation: a systematic review and meta-analysis of randomised controlled trials
Source: HighWire-hosted journal article supplement (doi:10.1136/bmjopen-2022-067921), 2023-07-01
Supplement: bmjopen-2022-067921supp001_data_supplement.pdf [file bmjopen-2022-067921supp001_data_supplement.pdf]

## Search strategy

### 1. PubMed search strategy

Date: From inception to 31 July 2022

Search strategy:

#1 AntiVEGF [All Fields]

#2 Anti-VEGF [All Fields]

#3 "Vascular Endothelial Growth Factors"[Mesh Terms]

#4 "Vascular Endothelial Growth Factors"[All Fields]

#5 VEGFs [All Fields]

#6 ranibizumab [MeSH Terms]

#7 ranibizumab [All Fields]

#8 rhumab [All Fields]

#9 bevacizumab [MeSH Terms]

#10 bevacizumab [All Fields]

#11 Avastin [All Fields]

#12 altuzan [All Fields]

#13 vasi [All Fields]

#14 aflibercept [All Fields]

#15 aflibercept[Supplementary Concept]

#16 eylea [All Fields]

#17 "VEGF Trap" [All Fields]

#18 Zaltrap [All Fields]

#19 "AVE 0005" [All Fields]

#20 conbercept [All Fields]

#21 KH902 [All Fields]

#22 "KH902 fusion protein"[Supplementary Concept]

#23 Brolucizumab [Supplementary Concept]

#24 Brolucizumab [All Fields]

#25 Beovu [All Fields]

#26 RTH258 [All Fields]

#27 ESBA1008 [All Fields]

#28 #1 OR #2 OR #3 OR #4 OR #5 OR #6 OR #7 OR #8 OR #9 OR #10 OR #11 OR

#12 OR #13 OR #14 OR #15 OR #16 OR #17 OR #18 OR #19 OR #20 OR #21

OR #22 OR #23 OR #24 OR #25 OR #26 OR #27

#29 "Choroidal Neovascularization" [MeSH Terms]

#30 "CNV" [All Fields]

#31 mCNV [All Fields]

#32 Choroid AND Neovascularization \* [All Fields]

#33 Choroidal AND Neovascularization \*[All Fields]

#34 #29 OR #30 OR #31 OR #32 OR #33

#35 Controlled Clinical Trial [Publication Type]

#36 Randomized Controlled Trial [Publication Type]

#37 "Controlled Clinical Trial" [All Fields]

#38 "Randomized Controlled Trial" [All Fields]

#39 "Randomized Controlled Trial" [All Fields]

#40 RCT [All Fields]

#41 random\*[All Fields]

#42 trial [All Fields]

#43 #35 OR #36 OR #37 OR #38 OR #39 OR #40 OR #41 OR #42

#44 #28 AND #34 AND #43

Items: 920

## 2. EMBASE search strategy

Date: From inception to 31 July 2022

Search strategy:

#1 AntiVEGF [All Fields]

#2 Anti-VEGF [All Fields]

#3 'vasculotropin inhibitor'/exp

#4 vasculotropin [All Fields]

#5 'Vascular Endothelial Growth Factors' [All Fields]

#6 VEGFs [All Fields]

#7 'ranibizumab'/exp

#8 ranibizumab [All Fields]

#9 lucenti [All Fields]

#10 rhumab [All Fields]

#11 'bevacizumab'/exp

#12 bevacizumab [All Fields]

#13 Avastin [All Fields]

#14 altuzan [All Fields]

#15 vasi [All Fields]

#16 aflibercept [All Fields]

#17 'aflibercept'/exp

#18 eylea [All Fields]

#19 'VEGF Trap' [All Fields]

#20 Zaltrap [All Fields]

#21 'AVE 0005' [All Fields]

#22 'conbercept'/exp

#23 KH902 [All Fields]

#24 'Brolucizumab'/exp

#25 Brolucizumab [All Fields]

#26 Beovu [All Fields]

#27 RTH258 [All Fields]

#28 ESBA1008 [All Fields]

#29 #1 OR #2 OR #3 OR #4 OR #5 OR #6 OR #7 OR #8 OR #9 OR #10 OR #11 OR

#12 OR #13 OR #14 OR #15 OR #16 OR #17 OR #18 OR #19 OR #20 OR #21

OR #22 OR #23 OR #24 OR #25 OR #26 OR #27 OR #28

#30 'Choroidal Neovascularization'/exp

#31 CNV [All Fields]

#32 mCNV [All Fields]

#33 (Choroid AND Neovascularization\*) [All Fields]

#34 (Choroidal AND Neovascularization\*) [All Fields]

#35 #30 OR #31 OR #32 OR #33 OR #34

#36 'controlled clinical trial'/exp

#37 'randomized controlled trial'/exp

#38 "Controlled Clinical Trial" [All Fields]

#39 "Randomized Controlled Trial" [All Fields]

#40 RCT [All Fields]

#41 random\* [All Fields]

#42 trial [All Fields]

#43 #36 OR #37 OR #38 OR #39 OR #40 OR #41 OR #42

#44 #29 AND #35 AND #43

Items: 1754

### 3. The Cochrane Library search strategy

Date: From inception to 31 July 2022

Search strategy:

Search term: [Title Abstract Keyword]

#1 AntiVEGF

#2 Anti-VEGF

#3 "Vascular Endothelial Growth Factors"

#4 VEGFs

#5 ranibizumab

#6 lucenti

#7 rhumab

#8 bevacizumab

#9 Avastin

#10 altuzan

#11 vasi

#12 aflibercept

#13 eylea

#14 "VEGF Trap"

#15 Zaltrap

#16 "AVE 0005"

#17 conbercept

#18 KH902

#19 Beovu

#20 Brolucizumab

#21 RTH258

#22 ESBA1008

#23 #1 OR #2 OR #3 OR #4 OR #5 OR #6 OR #7 OR #8 OR #9 OR #10 OR #11 OR

#12 OR #13 OR #14 OR #15 OR #16 OR #17 OR #18 OR #19 OR #20 OR #21

OR #22

#24 "Choroidal Neovascularization"

#25 CNV

#26 mCNV

#27 (Choroid AND Neovascularization\*)

#28 (Choroidal AND Neovascularization\*)

#29 #24 OR #25 OR #26 OR #27 OR #28

#30 "Controlled Clinical Trial"

#31 "Randomized Controlled Trial"

#32 RCT

#33 random\*

#34 trial

#35 #30 OR #31 OR #32 OR #33 OR #34

#36 #23 AND #29 AND #35

Items: 654



#### 4. Clinicaltrial.gov search strategy

Date: From inception to 31 July 2022

Condition or disease: Choroidal Neovascularization

Other terms: AntiVEGF OR Anti-VEGF OR "Vascular Endothelial Growth Factors"

OR VEGFs OR ranibizumab OR lucenti OR rhumab OR bevacizumab OR Avastin

OR altuzan OR vasi OR aflibercept OR eylea OR "VEGF Trap" OR Zaltrap OR "AVE

0005" OR conbercept OR KH902 OR Brolucizumab OR Beovu OR RTH258 OR

ESBA1008

Study type: Interventional Studies (Clinical Trials)

Study Results: Studies With Results

Status: Recruitment: Completed

Items: 44
