# Supplementary material for: Comparison of antivascular endothelial growth factor treatment for myopia choroidal neovascularisation: a systematic review and meta-analysis of randomised controlled trials
Source: HighWire-hosted journal article supplement (doi:10.1136/bmjopen-2022-067921), 2023-07-01
Supplement: bmjopen-2022-067921supp003_data_supplement.pdf [file bmjopen-2022-067921supp003_data_supplement.pdf]

Meta-analysis results of different anti-VEGF versus PDT treatment for myopia CNV.

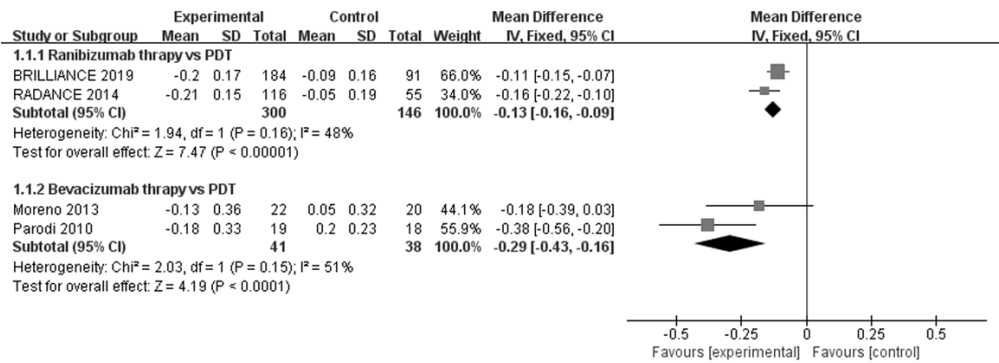

Figure 1 Forest plot of studies examining the mean change in BCVA (logMAR).

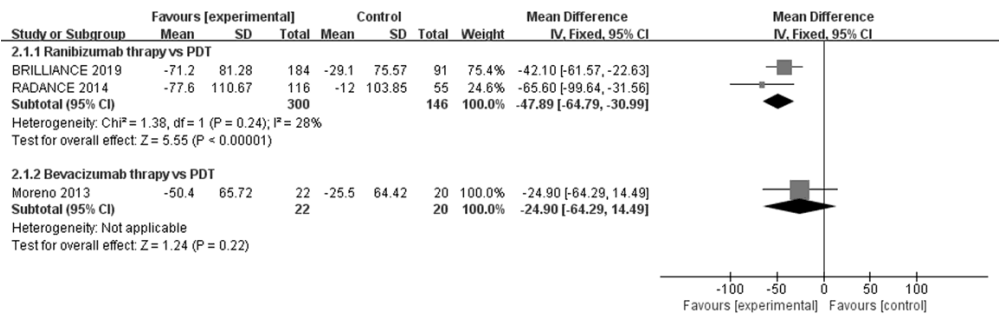

Figure 2 Forest plot of studies examining the mean change in CFT.

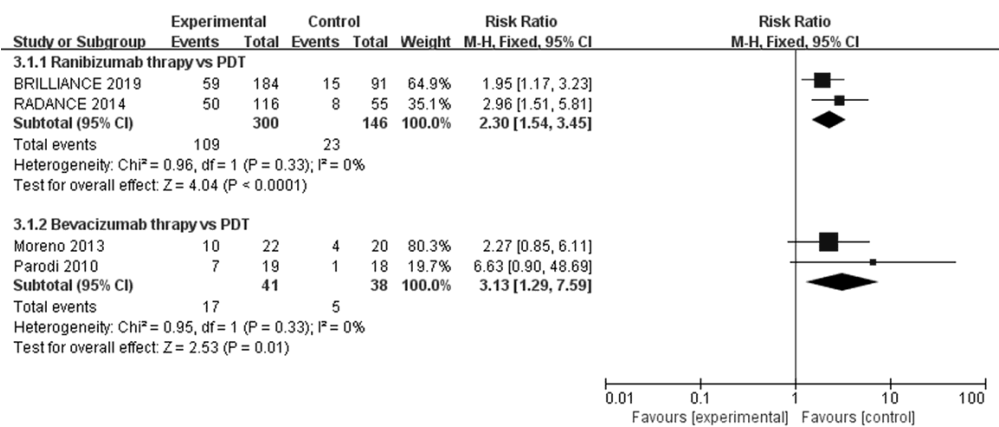

Figure 3 Forest plot of studies examining the number of patients who gained more than 3 lines in BCVA.

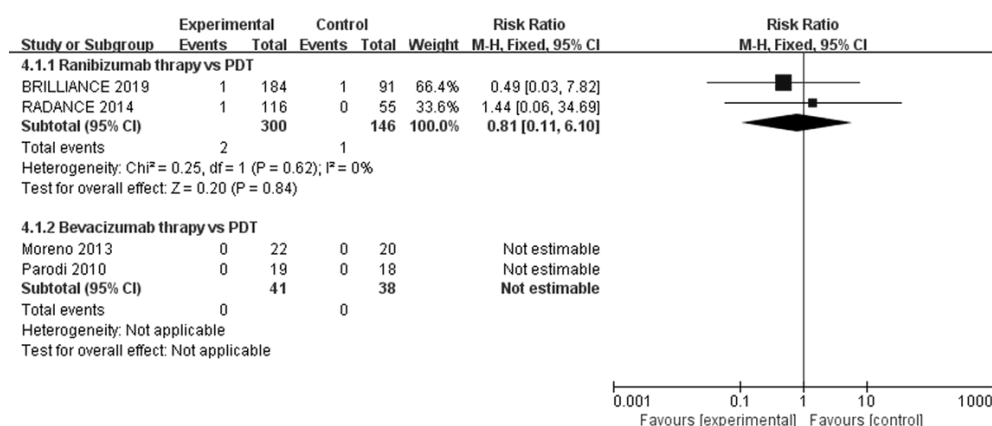

Figure 4 Forest plot of studies examining the serious ocular adverse events.

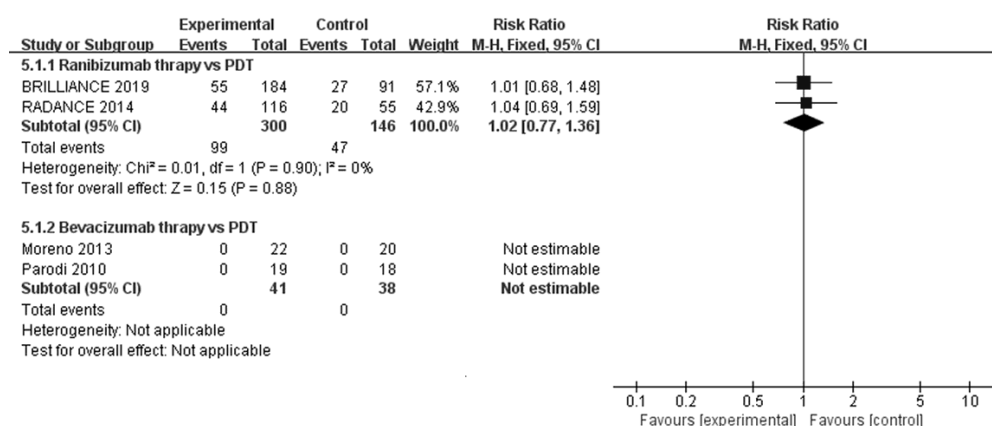

Figure 5 Forest plot of studies examining the non-serious ocular adverse events.
