# Supplementary figures and images for: Comparison of antivascular endothelial growth factor treatment for myopia choroidal neovascularisation: a systematic review and meta-analysis of randomised controlled trials
Source: HighWire-hosted journal article supplement (doi:10.1136/bmjopen-2022-067921), 2023-07-01

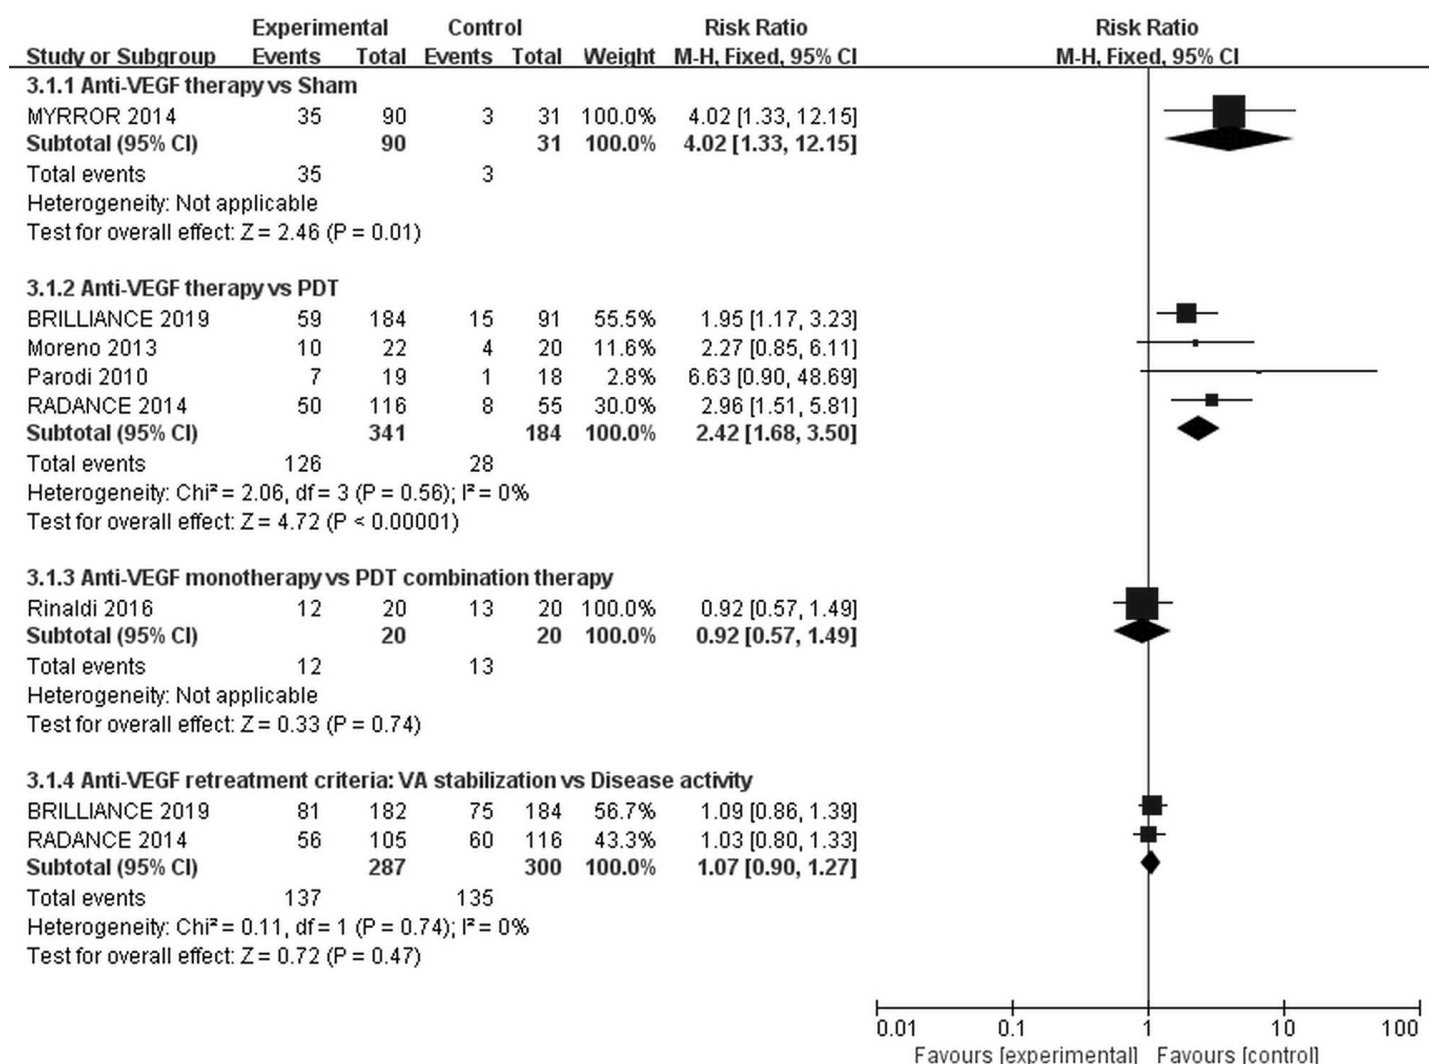

Supplement: bmjopen-2022-067921supp004_data_supplement.pdf [file bmjopen-2022-067921supp004_data_supplement.pdf]
